# Supplementary material for: The effect of size on the optical properties of guanine nanostructures: a femtosecond to nanosecond study
Source: Royal Society of Chemistry journal article supplement (doi:10.1039/c3cp00060e), 2013-01-01
Supplement: c3cp00060e.pdf [file c3cp00060e.pdf]

## Supporting Information

### Size effect on the optical properties of guanine nanostructures: a femtosecond to nanosecond study

*Ying Hua, Pascale Chaugenet-Barret, Thomas Gustavsson, and Dimitra Markovitsi<sup>1\*</sup>*

CNRS, IRAMIS, SPAM, Laboratoire Francis Perrin, URA 2453, 91191 Gif-sur-Yvette,  
France

\*Address correspondence to: [dimitra.markovitsi@cea.fr](mailto:dimitra.markovitsi@cea.fr)

- Fits of the fluorescence decays
- Determination of fluorescence properties of dGMP and TMP mixtures from independent measurements

## Fits of the fluorescence decays.

We fitted the fluorescence decays using three-exponential functions.  $F(t) = \sum_{i=1}^n a_i \exp(-\frac{t}{\tau_i})$ , where  $a_i$  and  $\tau_i$  represent pre-exponential factors and time constants, respectively. The average lifetime was defined as:  $\langle \tau \rangle = \sum a_i \tau_i$ .

**Table SI-1.** Fitted parameters determined for the FU (0-80 ps) and TCSPC (0-10 ns) fluorescence decays of  $d(\text{TG}_5\text{T})_4$  at 360 nm; they were used to construct the plots in **Figure 5b**; the time constants in ps.

|              | $a_1$  | $\tau_1$ | $a_2$  | $\tau_2$ | $a_3$  | $\tau_3$ | $\langle \tau \rangle$ |
|--------------|--------|----------|--------|----------|--------|----------|------------------------|
| <i>FU</i>    | 0.62   | 0.15     | 0.17   | 1.28     | 0.21   | 12.17    | 2.9                    |
| <i>TCSPC</i> | 0.9967 | 15       | 0.0029 | 188      | 0.0004 | 1847     | 16.3                   |

**Table SI-2.** Fitted parameters determined for the TCSPC fluorescence decays of G-quadruplexes at 450 nm. The corresponding fitted functions were used to construct the histograms in **Figure 6**; the time constants in ps.

|                            | $a_1$ | $\tau_1$ | $a_2$ | $\tau_2$ | $a_3$ | $\tau_3$ | $\langle \tau \rangle$ |
|----------------------------|-------|----------|-------|----------|-------|----------|------------------------|
| $d(\text{TG}_3\text{T})_4$ | 0.887 | 14       | 0.106 | 81       | 0.007 | 624      | 25.7                   |
| $d(\text{TG}_4\text{T})_4$ | 0.959 | 19       | 0.036 | 164      | 0.005 | 1451     | 30.9                   |
| $d(\text{TG}_5\text{T})_4$ | 0.954 | 19       | 0.037 | 164      | 0.009 | 1453     | 36.8                   |

## Determination of fluorescence properties of dGMP and TMP mixtures from independent measurements

The fluorescence spectra and fluorescence anisotropies of dGMP and TMP mixtures shown, in Figures 3 and 7, were determined using the dGMP and TMP properties determined previously, according to equations below..

a) fluorescence spectra:

$$F(\lambda) = \sum_i (1 - 10^{-x_i \times A_Q}) \times \phi_i \times \frac{F_i(\lambda)}{\int F_i(\lambda) \times d\lambda}$$
$$x_i = \frac{n_i \times \epsilon_i}{\sum_i n_i \times \epsilon_i}$$

The subscripts  $i$  and  $Q$  denote, respectively, the mono-nucleotide  $i$  and the G-quadruplex.  $n_i$  : molar fraction of mono-nucleotide  $i$  in the G-quadruplex;  $A_Q$  is the absorbance and  $\epsilon_i$  the molar extinction coefficient at the excitation wavelength;  $\phi_i$  is the fluorescence quantum yield;  $F_i$  represents the normalized fluorescence spectrum;  $\lambda$  : emission wavelength.

b) fluorescence anisotropies at the emission wavelength  $\lambda_{em}$ :

$$r(\lambda, t) = \frac{\sum_i (1 - 10^{-x_i \times A_Q}) \times \phi_i \times \frac{F_i(\lambda_{em})}{\int F_i(\lambda) \times d\lambda} \times \frac{I_i(\lambda_{em}, t)}{\int I_i(\lambda_{em}, t) \times dt} \times r_i(\lambda_{em}, t)}{\sum_i (1 - 10^{-x_i \times A_Q}) \times \phi_i \times \frac{F_i(\lambda_{em})}{\int F_i(\lambda) \times d\lambda} \times \frac{I_i(\lambda_{em}, t)}{\int I_i(\lambda_{em}, t) \times dt}}$$

$I_i(\lambda_{em}, t)$  represents the fluorescence intensity of mononucleotide  $I$  recorded at time  $t$  and  $r_i$  the fluorescence decay .
